# Supplementary material for: A Custom Panel for Profiling Microglia Gene Expression
Source: MDPI journal article supplement (doi:10.3390/cells13070630), 2024-04-04
Supplement: s1 [file s1]

# A Custom Panel for Profiling Microglia Gene Expression

Phani Sankar Potru <sup>1</sup>, Natascha Vidovic <sup>1</sup>, Susanne Wiemann <sup>1</sup>, Tamara Ruß <sup>1</sup>, Marcel Trautmann <sup>2</sup>, and Björn Spittau <sup>1</sup>

Supplementary data:

|                                                         |       |                                                                                                                                                                                                                                                                                                                                                                |                                                   |       |                                                                                                                                                                                                                                    |
|---------------------------------------------------------|-------|----------------------------------------------------------------------------------------------------------------------------------------------------------------------------------------------------------------------------------------------------------------------------------------------------------------------------------------------------------------|---------------------------------------------------|-------|------------------------------------------------------------------------------------------------------------------------------------------------------------------------------------------------------------------------------------|
| (a)                                                     |       |                                                                                                                                                                                                                                                                                                                                                                | (b)                                               |       |                                                                                                                                                                                                                                    |
| Names                                                   | total | elements                                                                                                                                                                                                                                                                                                                                                       | Names                                             | total | elements                                                                                                                                                                                                                           |
| Adult MG vs BV2_Up AdultMG vs BMMn_Up AdultMG vs pMG_Up | 62    | Nlfp3 P2Ry13 Ctsa Ccr9 Nos2 C3Ar1 Siglec-H Casp4 Ilt3 Foris Cd9 Cd33 Ilt3 Cass4 Tyrobp It27 P2Ry7 Tgfb2 Bmp2 Il6 Cxcl2 Ilt8 Bin1 Car1R Gpr34 Tgfa Ccr5 Bmp3 Casp1 Cx3Cr1 Picalm Nr1h3 Tmem119 Ilt10Rb Bmp5 Ilt1A Ilt16Aa Ssl1 Cd47 Tnf Tl2c Hmgb P2Ry12 Ccl4 Tnfst13B Abi3 B2M Ccr4 Tgfb1 Ccr6 Gm Pycad C10b Slc2A5 Clec7A Trem2 Ctss Olfml3 Bmp10 Cxcl9 Ilt21 | AdultMG vs BMMn_Down AdultMG vs pMG_Down          | 3     | Lyz2 Thbs1 C3                                                                                                                                                                                                                      |
| AdultMG vs BMMn_Up AdultMG vs pMG_Up                    | 8     | Tnfst11 Ilt8 Cat7 Ccl9 Ilt17A Cd68 Lpl Ccl3                                                                                                                                                                                                                                                                                                                    | Adult MG vs BV2_Down AdultMG vs BMMn_Down         | 1     | Tfrc                                                                                                                                                                                                                               |
| Adult MG vs BV2_Up AdultMG vs BMMn_Up                   | 34    | Tgfb2 Bmp4 Ahr1 Ilt17F Ccl14 Nlfp5 Ilgav Lamp2 Cond1 Timp2 Lpl1 Ms4A7 Ilt7 Axl Bmp7 Tnfst11B Bmp6B Nodal Lysb Ilt8 Sparc Spp3A Msc1 Tgfr Lamp1 Apob3 Cxcl10 Apoe Ldhr Ilt5 Tnfst10 Gdnf Bmp1 Fgf2                                                                                                                                                              | Adult MG vs BV2_Down AdultMG vs pMG_Down          | 5     | Fabp5 Igf1 Spp1 Gpnmb Mfge8                                                                                                                                                                                                        |
| Adult MG vs BV2_Up AdultMG vs pMG_Up                    | 17    | Ccl6 Cd74 Tgfb1 Ccr3 C5Ar1 Apoc2 Pknox2 Cd22 Rln3 Ms4A4C Ccr2 Sorf1 Ilt12A Ilt16 Ilt15 Plcg2 Nlrp4                                                                                                                                                                                                                                                             | AdultMG vs BMMn_Down                              | 7     | Cxcr4 Zyx Sorf1 Cybb Ilt12A Pona Cd72                                                                                                                                                                                              |
| AdultMG vs BMMn_Up                                      | 9     | Ccl2 Rabep1 Gpnmb Ccl7 Spp1 Ctsb Igf1 Csf1                                                                                                                                                                                                                                                                                                                     | AdultMG vs pMG_Down                               | 17    | Nfya Bmp6 Tgfb3 Tgfb3 Bmp7 Tnfst11B Fth1 Tgfb2 Msr1 Vegfa Timp2 Bdnf Lrp6 Bmp4                                                                                                                                                     |
| AdultMG vs pMG_Up                                       | 3     | Slc16A3 Ilgax Cd72                                                                                                                                                                                                                                                                                                                                             | Adult MG vs BV2_Down                              | 7     | Nlr3 Lpl Ccl3 Mif Lirb4 Cd36 Lgals3                                                                                                                                                                                                |
| Adult MG vs BV2_Up                                      | 17    | Zyx Stat2 Jak1 Pdgrc Tgfb3 Tmsb4X Cxcr4 Bmp6 Stat1 Tgfb3 Bdnf Cxcl5 Ilt1R1 Apoc1 Thbs1 Apobec1 C3                                                                                                                                                                                                                                                              |                                                   |       |                                                                                                                                                                                                                                    |
| (c)                                                     |       |                                                                                                                                                                                                                                                                                                                                                                | (d)                                               |       |                                                                                                                                                                                                                                    |
| Names                                                   | total | elements                                                                                                                                                                                                                                                                                                                                                       | Names                                             | total | elements                                                                                                                                                                                                                           |
| BV2 vs BMMn_Up pMG vs BMMn_Up pMG vs BV2_Up             | 6     | Sal1 Fth1 C3Ar1 Ccl7 Ctsb Ctss                                                                                                                                                                                                                                                                                                                                 | BV2 vs BMMn_Down pMG vs BMMn_Down pMG vs BV2_Down | 3     | Cd74 Plcg2 Cd72                                                                                                                                                                                                                    |
| pMG vs BMMn_Up pMG vs BV2_Up                            | 48    | Bmp6 Tgfb3 Bmp7 Tnfst11B Tgfb2 Msr1 Ccl3 Tlr2 Hexb Bdnf Lrp6 Bmp4 Ilt18 Ahr1 Sparc Spp3A Ccl5 Foris Ilt1R1 Pdgrc Igf1 Lamp1 Cxcl10 Tgfb2 Apoe Tgfb3 Ldhr Ilgav Lamp2 Cxcl2 Cond1 Timp2 Tnfst10 C10b Lpl1 Gpr34 Tgfa Ms4A7 Ilt7 Gdnf Bmp1 Bmp3 Cx3Cr1 Axl Olfml3 Tmem119 Bmp5 Fgf2                                                                              | pMG vs BMMn_Down pMG vs BV2_Down                  | 6     | Tfrc Cass4 Slc16A3 Panx1 Clec7A Casp1                                                                                                                                                                                              |
| BV2 vs BMMn_Up pMG vs BMMn_Up                           | 17    | Fabp5 Ctlr Lirb4 Ccl4 Spp1 Ccl14 Ccl3 Ccl2 Ilt1A Igf1 Cd68 Slc2A5 Csf1 Ilgav5 Trem2 Mfge8 Gpnmb                                                                                                                                                                                                                                                                | BV2 vs BMMn_Down pMG vs BMMn_Down                 | 23    | Cxcr4 Cd22 Ilt10Ra Rln3 Ccl6 Tgfb1 Ms4A4C Ccr2 Siglec-H Sorf1 Cybb Ilt12A Ccr3 Cd33 Ilt16 Tnfst13B Pona Abi3 Apoc2 Ilt1B Pknox2 C3 Cxcl9                                                                                           |
| pMG vs BV2_Up                                           | 41    | P2Ry13 Cxcr4 Ilt10Ra Stat1 Bmp6B Gas P2Ry12 Nodal Siglec-H Zyx Sorf1 Cxcl5 Ilt17F Ilt12A Ccr3 C5Ar1 Cd33 Stat2 Ilt3 Jak1 Mrc1 Ccr4 Ilt27 Apbb3 Tgfb1 Lyz2 Bmp2 Nlfp5 Apoc1 Ilt5 Nlr3 Thbs1 Pycad Tmsb4X Apobec1 Picalm Bmp10 Nfya C3 Cxcl9 Ilt21                                                                                                               | pMG vs BV2_Down                                   | 18    | Nlfp3 Nlr3 Lpl Mif Ilt1R1 Lirb4 Ccl4 Ilgax Spp1 P2Ry7 Cat7 Ccl9 Ccl3 Cd68 Cd36 Mfge8 Gpnmb Lgals3                                                                                                                                  |
| pMG vs BMMn_Up                                          | 2     | Ilt8 Gm                                                                                                                                                                                                                                                                                                                                                        | BV2 vs BMMn_Down                                  | 38    | P2Ry13 Bmp6 Stat1 Tnfst11B Bdnf P2Ry12 Zyx Sparc Cxcl5 C5Ar1 Jak1 Mrc1 Ilt5 Ilt1R1 Pdgrc Nfya Ilt27 Tgfb1 Lyz2 Tgfb2 Bmp2 Tgfb3 Ldhr Apoc1 Nlr3 Pycad Thbs1 C10b Tmsb4X Gpr34 Apobec1 Cx3Cr1 Picalm Axl Bmp10 Olfml3 Tmem119 Ilt21 |
| BV2 vs BMMn_Up                                          | 13    | Nlr3 Lpl Tnf Mif Ilt1R1 Ilt3 Cd9 Slc16A3 P2Ry7 Ccl9 Rabep1 Cd36 Lgals3                                                                                                                                                                                                                                                                                         |                                                   |       |                                                                                                                                                                                                                                    |

Figure S1: Tables of the with the gene names and the groups compared corresponding to the Venn diagrams.

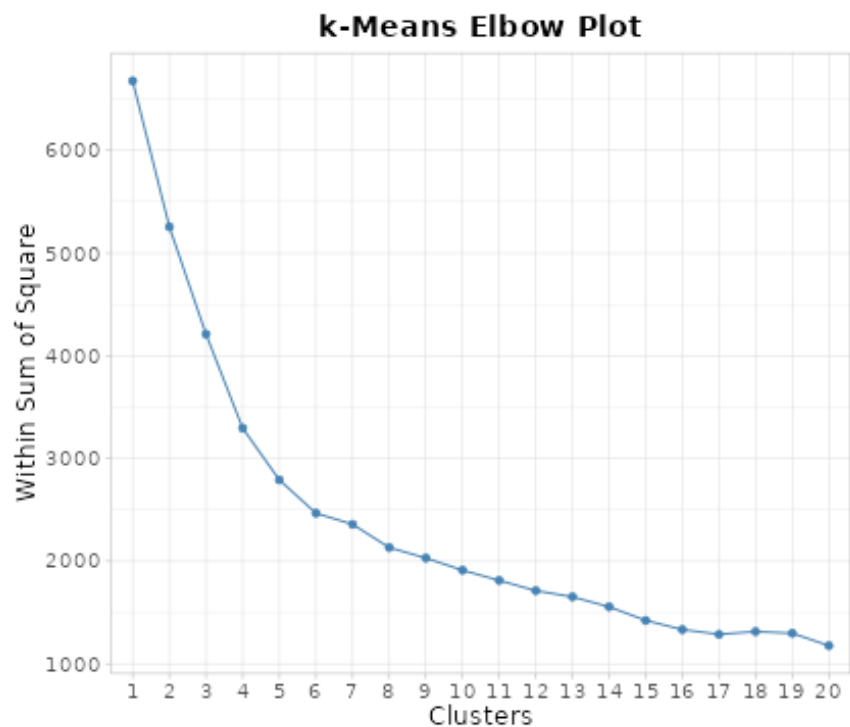

Figure S2: Elbow plot used for determining the number of k-means clusters.
